# Supplementary material for: Microanalysis of pharmaceutical cocrystals using a nano-spot method coupled with Raman spectroscopy
Source: Royal Society of Chemistry journal article supplement (doi:10.1039/c6ce00913a), 2016-01-01
Supplement: c6ce00913a1.pdf [file c6ce00913a1.pdf]

**Supporting Information**

**Microanalysis of pharmaceutical cocrystals using a nano-spot method  
coupled with microscopic Raman spectroscopy**

Yusuke Maeno<sup>a</sup>, Motoki Inoue<sup>b</sup>, Toyofumi Suzuki<sup>c</sup>, Kazuo Tomono<sup>c</sup>, Toshiro Fukami<sup>b,\*</sup>

a. Analysis Research Department, Nissan Chemical Industries, Ltd.

b. Department of Molecular Pharmaceutics, Meiji Pharmaceutical University

c. Laboratory of Pharmaceutics, School of Pharmacy, Nihon University

\*Corresponding author: Toshiro Fukami, PhD

Department of Molecular Pharmaceutics, Meiji Pharmaceutical University

2-522-1 Noshio, Kiyose, Tokyo 204-8588, Japan

TEL/FAX: +81-42-495-8936

E-mail: fukami@my-pharm.ac.jp

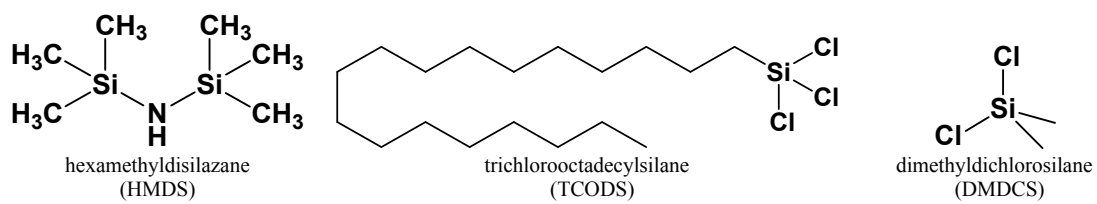

**Figure S1.** Chemical structure of alkyl type hydrophobized agents.

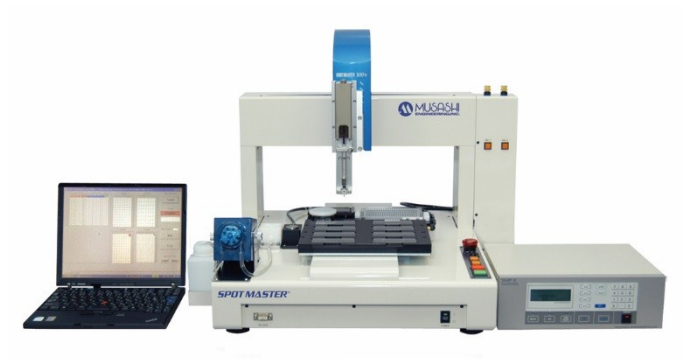

**Figure S2.** The image of SPOT MASTER.

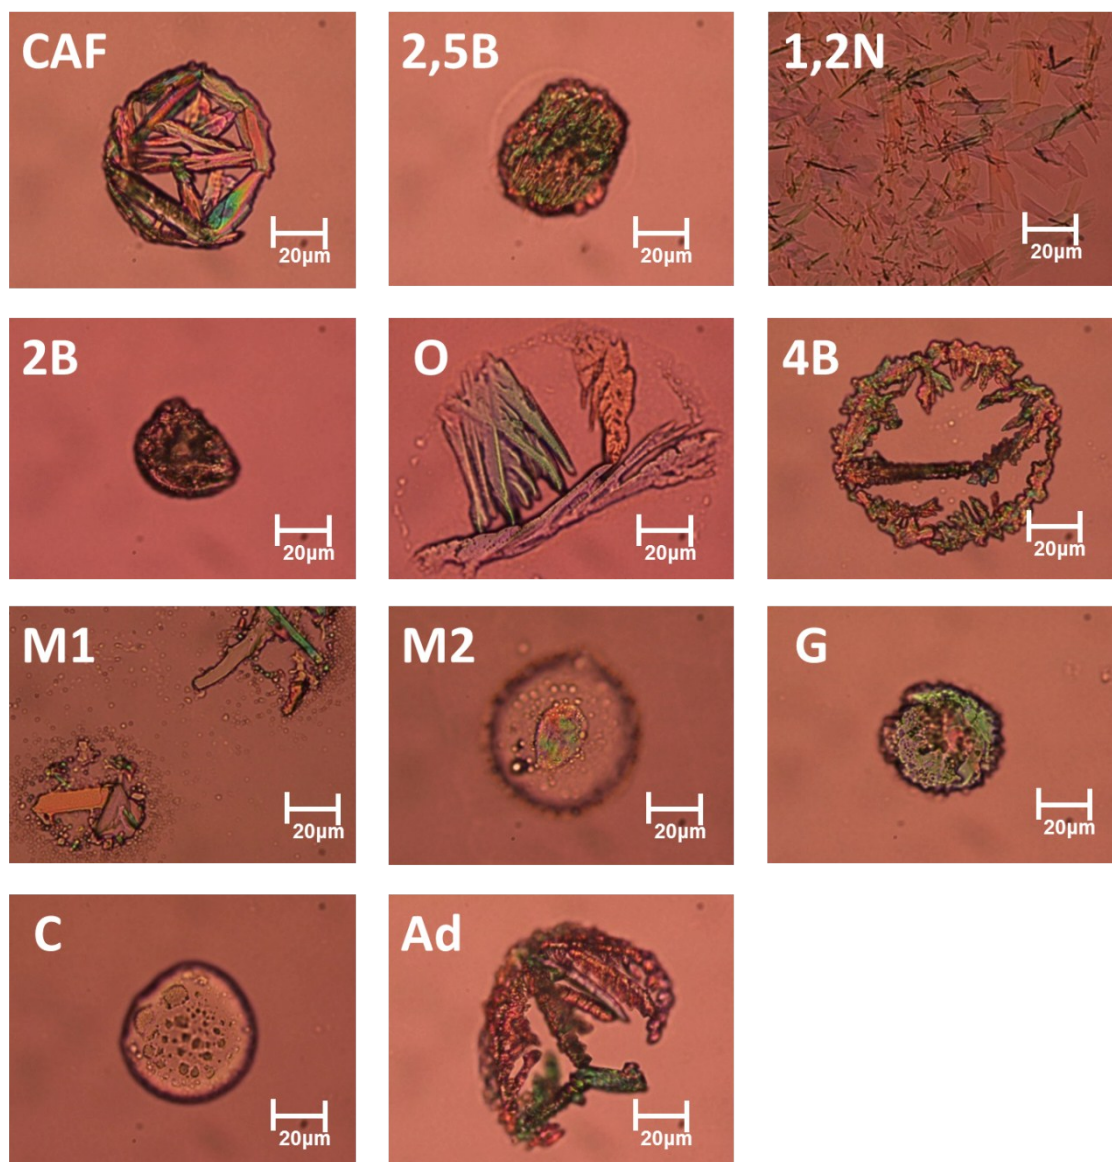

**Figure S3.** Crystals of CAF and coformer for measurement of Raman spectroscopy (10 ng/50 nL).

All droplets are 50 nL spotted manually, and every characters indicate the abbreviations of coformers.

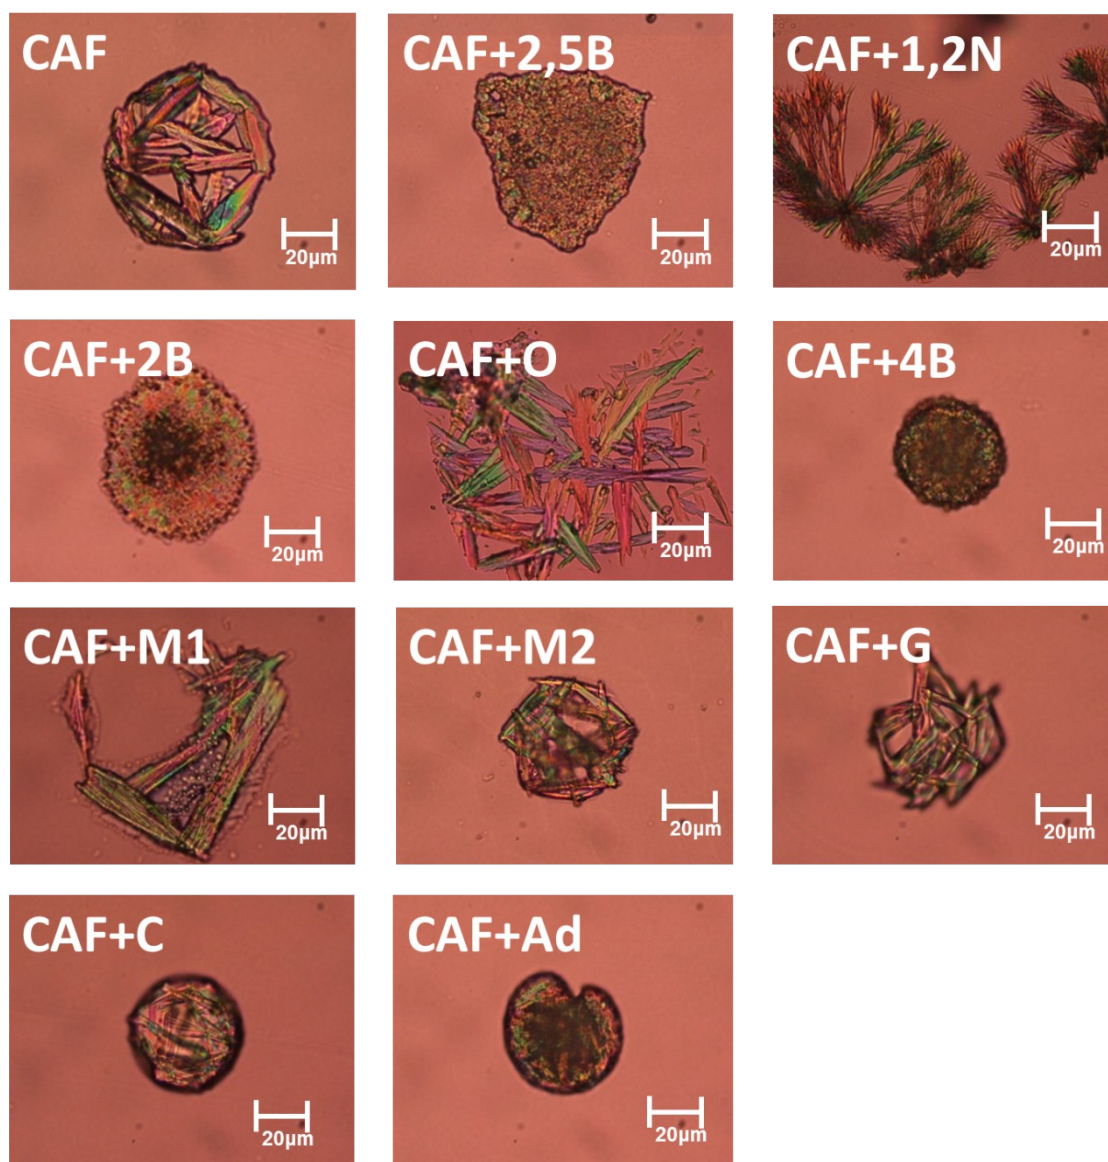

**Figure S4.** Crystals of CAF and mixture solution of CAF and coformer for measurement of Raman spectroscopy (10 ng/50 nL). All droplets are 50 nL spotted manually, and every characters indicate the abbreviations of caffeine and coformers.

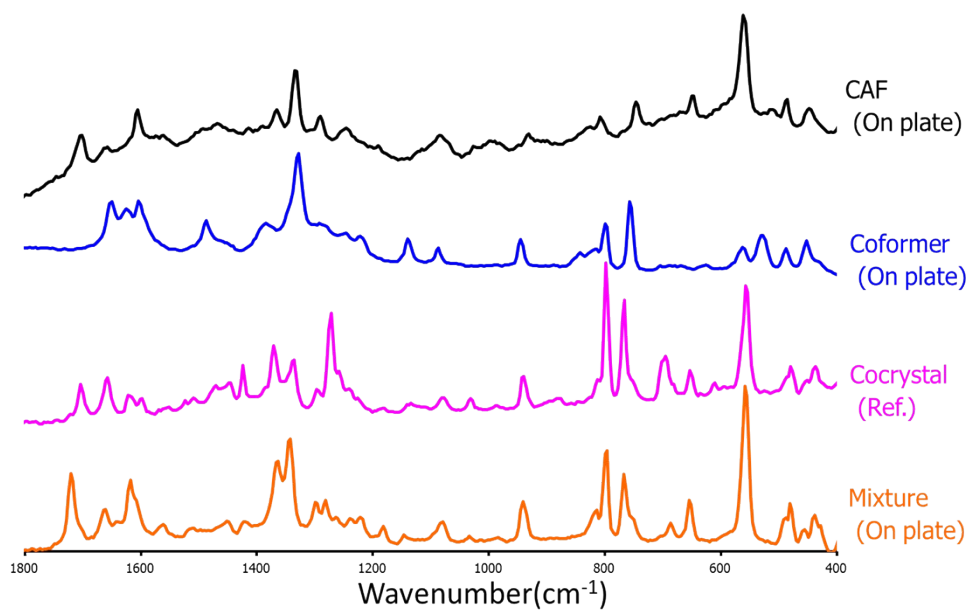

**Figure S5.** Raman spectra of CAF-2,5B series. “On plate” indicates the crystal on the hydrophobized plate. “Mixture” indicates the crystal obtained from the mixture of CAF and 2,5B (coformer) on the plate. “Ref.” indicates reference cocystal.

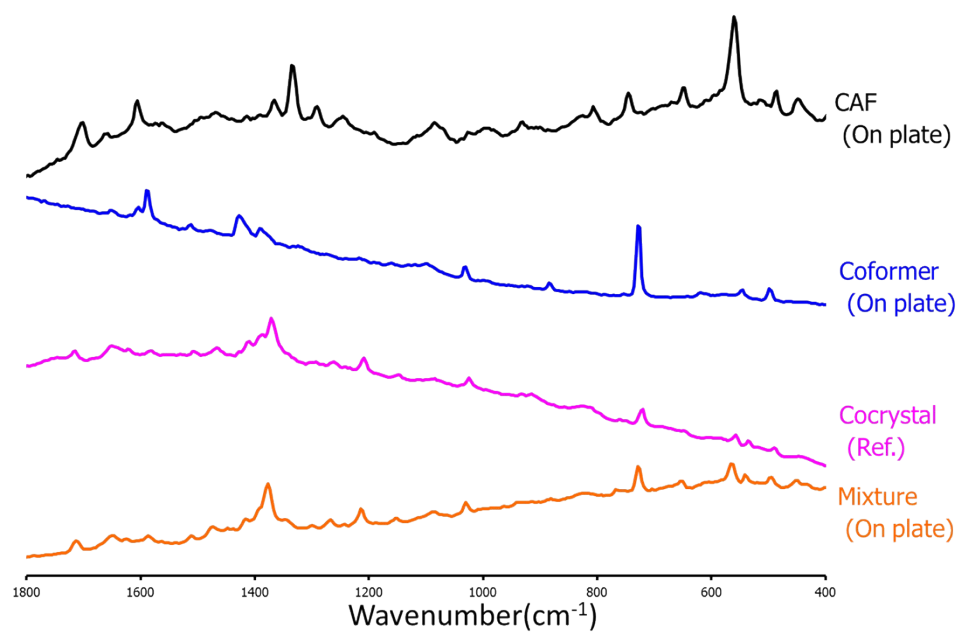

**Figure S6.** Raman spectra of CAF-1,2N series. “On plate” indicates the crystal on the hydrophobized plate. “Mixture” indicates the crystal obtained from the mixture of CAF and 1,2N (coformer) on the plate. “Ref.” indicates reference cocystal.

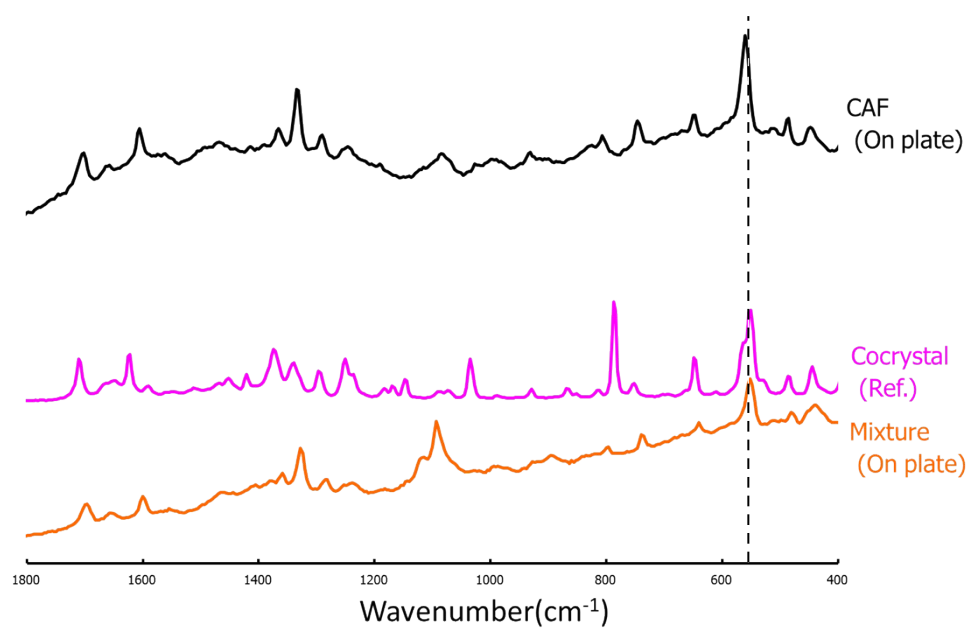

**Figure S7.** Raman spectra of CAF-2B series. “On plate” indicates the crystal on the hydrophobized plate. “Mixture” indicates the crystal obtained from the mixture of CAF and 2B (coformer) on the plate. “Ref.” indicates reference cocystal.



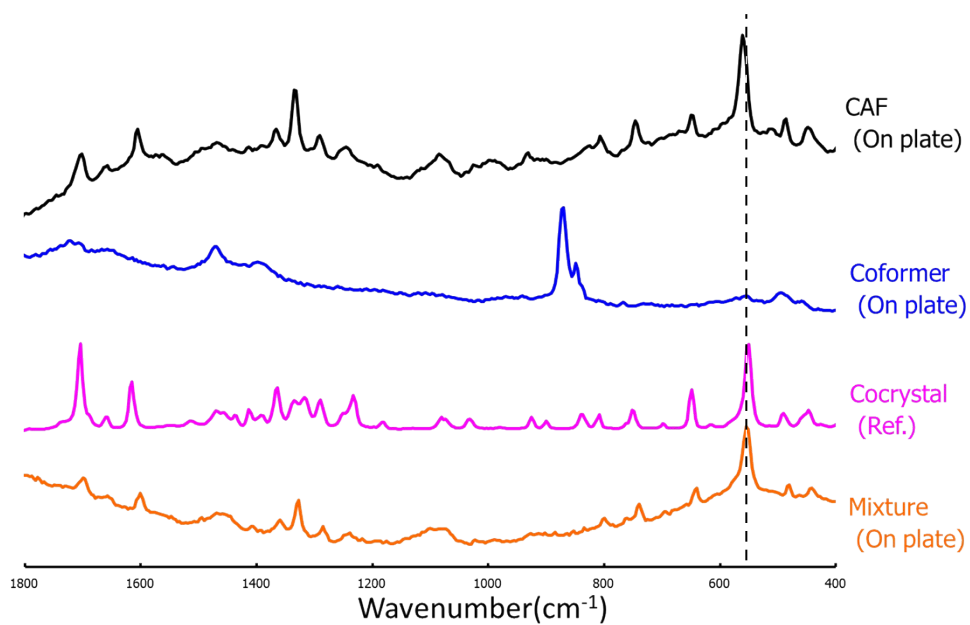

**Figure S8.** Raman spectra of CAF-O series. “On plate” indicates the crystal on the hydrophobized plate. “Mixture” indicates the crystal obtained from the mixture of CAF and O (coformer) on the plate. “Ref.” indicates reference cocystal.

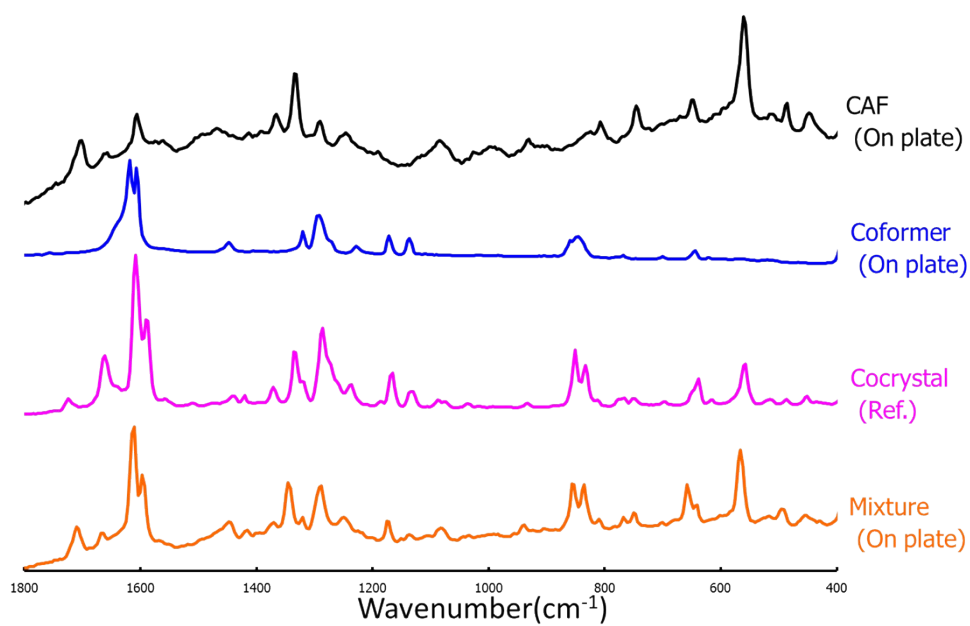

**Figure S9.** Raman spectra of CAF-4B series. “On plate” indicates the crystal on the hydrophobized plate. “Mixture” indicates the crystal obtained from the mixture of CAF and 4B (coformer) on the plate. “Ref.” indicates reference cocystal.

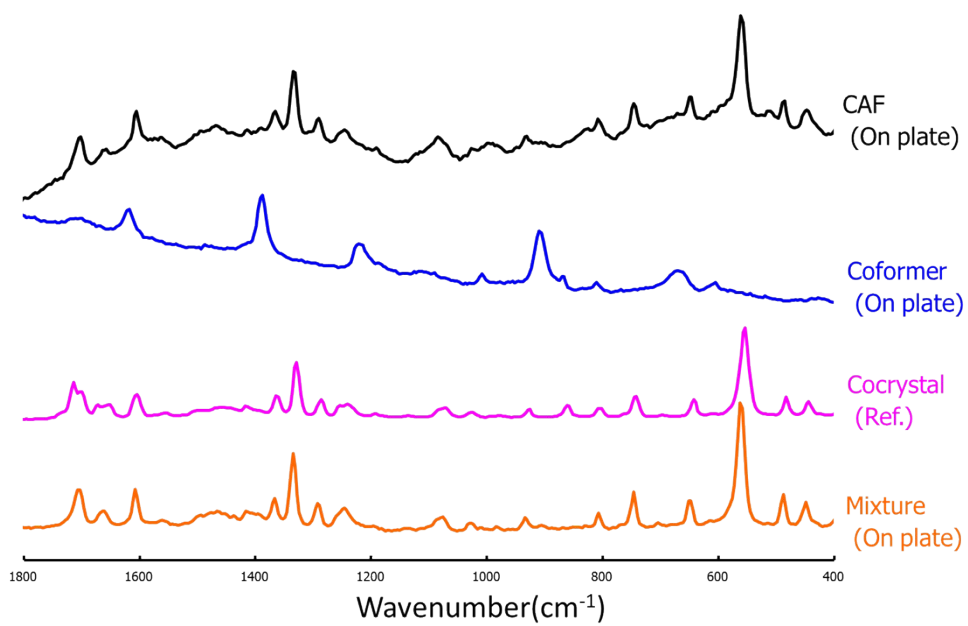

**Figure S10.** Raman spectra of CAF-M1 series. “On plate” indicates the crystal on the hydrophobized plate. “Mixture” indicates the crystal obtained from the mixture of CAF and M1 (coformer) on the plate. “Ref.” indicates reference cocystal.

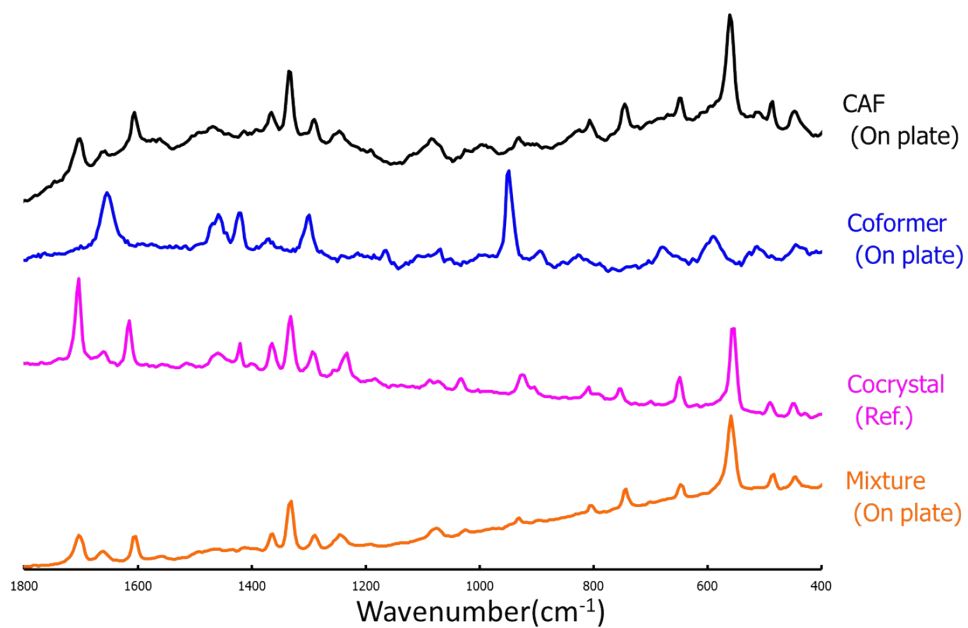

**Figure S11.** Raman spectra of CAF-G series. “On plate” indicates the crystal on the hydrophobized plate. “Mixture” indicates the crystal obtained from the mixture of CAF and G (coformer) on the plate. “Ref.” indicates reference cocystal.

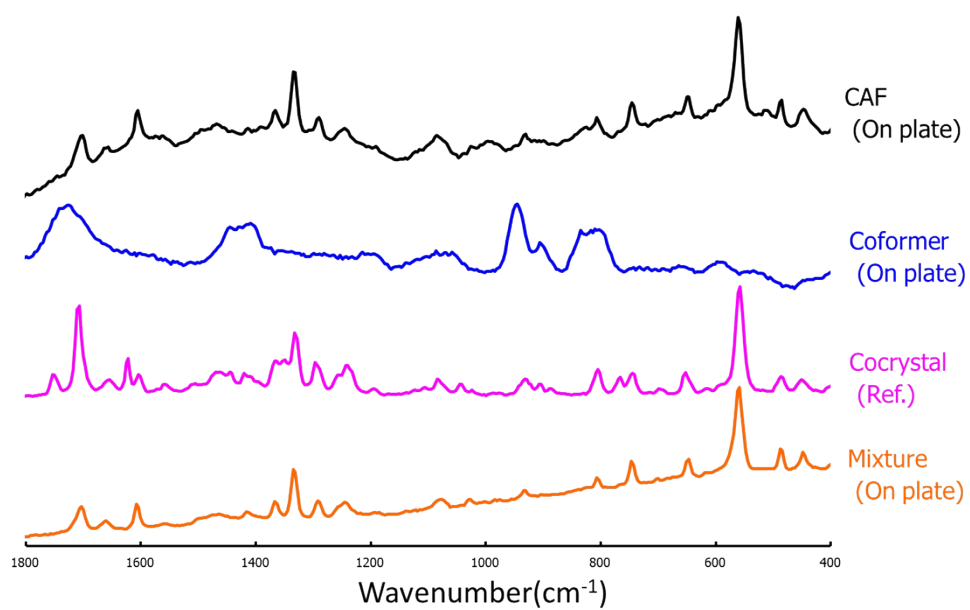

**Figure S12.** Raman spectra of CAF-C series. “On plate” indicates the crystal on the hydrophobized plate. “Mixture” indicates the crystal obtained from the mixture of CAF and C (coformer) on the plate. “Ref.” indicates reference cocystal.

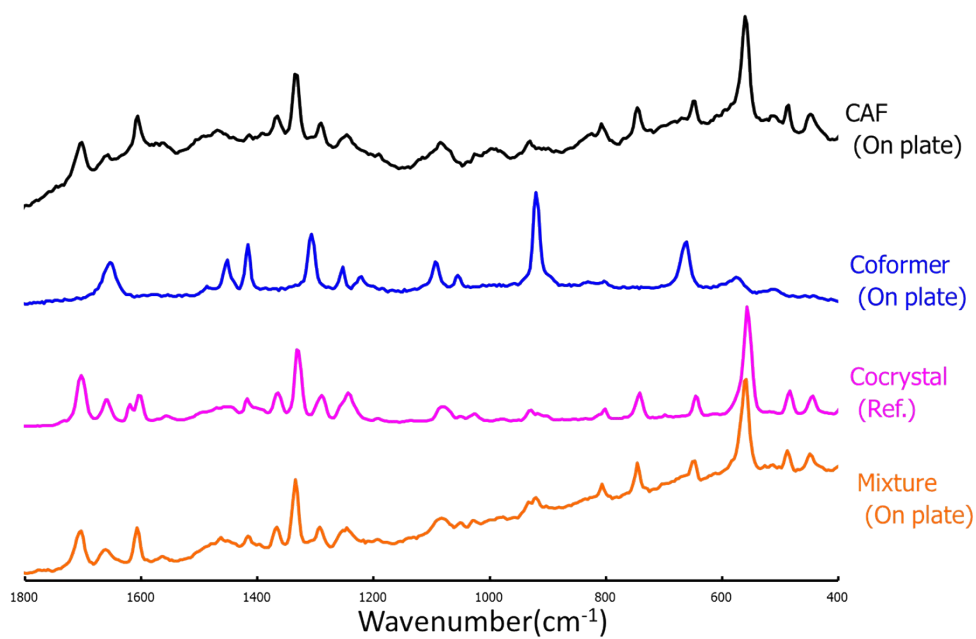

**Figure S13.** Raman spectra of CAF-Ad series. “On plate” indicates the crystal on the hydrophobized plate. “Mixture” indicates the crystal obtained from the mixture of CAF and Ad (coformer) on the plate. “Ref.” indicates reference cocystal.

## **Movies**

**Movie S1.** The drying step after spotting on the hydrophobized glass plate using Novec1720.

**Movie S2.** The drying step after spotting on the hydrophobized glass plate using TCOCS+HMDS.

**Movie S3.** Automation of the nano-spot method using SPOT MASTER.

**Movie S4.** Automation of the nano-spot method using SPOT MASTER.
